# Supplementary material
Source: PubMed Central journal article supplement (PMC3534801)
Supplement: NIHMS409826-supplement-01.pdf [file NIHMS409826-supplement-01.pdf]

## Supplementary Material Online

### Newborn cortical neurons: only for neonates?

David M. Feliciano and Angélique Bordey

Departments of Neurosurgery, and Cellular and Molecular Physiology, Yale University School of Medicine, New Haven, CT, 06520, USA.

Corresponding author: Bordey, A. (angelique.bordey@yale.edu)

**Table S1: Reports of the lack of adult neurogenesis in the adult neocortex**

| Species                                                                                    | Age             | BrdU                                                                                                                                                                                                                                      | Additional Details                                                                                                                            | Conclusions                                                                     | Notes                            | Refs |
|--------------------------------------------------------------------------------------------|-----------------|-------------------------------------------------------------------------------------------------------------------------------------------------------------------------------------------------------------------------------------------|-----------------------------------------------------------------------------------------------------------------------------------------------|---------------------------------------------------------------------------------|----------------------------------|------|
| <b>Humans</b>                                                                              |                 |                                                                                                                                                                                                                                           |                                                                                                                                               |                                                                                 |                                  |      |
| * 7 adult humans for <sup>14</sup> C<br>* Unknown number of humans for BrdU                | Unknown         | *BrdU: 250 mg saline (i.v.)<br><br>* No BrdU/NeuN+                                                                                                                                                                                        | * <sup>14</sup> C: 5 humans born before and 2 after the nuclear test<br>* only <1% neurogenesis possible and would be transient (<4.2 months) | *None detected (if they exist, <1%)                                             | Detection sensitivity may be low | [S1] |
| <b>Monkeys</b>                                                                             |                 |                                                                                                                                                                                                                                           |                                                                                                                                               |                                                                                 |                                  |      |
| 10 adult male and nonpregnant female <i>Macaca fascicularis</i> and <i>mulatta</i> monkeys | >5 years old    | * BrdU (i.v.)<br>* 5 daily injections of BrdU (50 or 75 mg/kg), survival: 2 hours or 12, 31, 75, 92 days<br>* One monkey: 10 days after 4 injections/day (100 mg/kg)<br>* One monkey: 23 days after 2 injections, 5 days apart (75 mg/kg) | None                                                                                                                                          | * BrdU/NeuN: none<br>* Identification of BrdU+ satellite glia on top of neurons |                                  | [S2] |
| <b>Rats</b>                                                                                |                 |                                                                                                                                                                                                                                           |                                                                                                                                               |                                                                                 |                                  |      |
| Male Wistar rats                                                                           | 11-12 weeks old | * BrdU: 200 mg/kg, one IP injection or twice a day for 2 or 3 days<br>* Survival: different time points                                                                                                                                   | Dil presumably does not originate from SVZ but an adjacent temporal                                                                           | Transient neurogenesis and no BrdU/NeuN+ cells in the adjacent                  | TGL = nodal point surrounded by  | [S3] |

|                                                                    |                                            |                                                                                                                                                                                                                              |                                                                                                                                                                                                                                                 |                                                                        |                                              |      |
|--------------------------------------------------------------------|--------------------------------------------|------------------------------------------------------------------------------------------------------------------------------------------------------------------------------------------------------------------------------|-------------------------------------------------------------------------------------------------------------------------------------------------------------------------------------------------------------------------------------------------|------------------------------------------------------------------------|----------------------------------------------|------|
|                                                                    |                                            | *Identification of a temporal germinal layer and stream containing BrdU+ progenitors (e.g. Pax6+), BrdU+ immature neurons (e.g. DCX+ and Tuj1+) and BrdU/NeuN+ cells.                                                        | germinal zone (TGL)                                                                                                                                                                                                                             | temporal cortex                                                        | amygdala, hippocampus and temporal neocortex |      |
| * Wistar rats<br>* Flathead mutant rat (microcephaly and seizures) | Neonates:<br>P2-P9<br>Adults:<br>P28, ≥P68 | * BrdU: 40 mg/kg IP, 1 to 4 injections spaced 2-4 hrs, P10-P15,<br>* One day prior to or after GFP retrovirus injection<br><br>No NeuN/BrdU+ cells found that were either GFP+ or GFP-, but identification of BrdU/DCX cells | * Retrovirus: 1-2x10 <sup>8</sup> titer, 1 µl injected into the anterior lateral ventricle<br>* Injections at P2-3, P10-19:<br>* NeuN+ pyramidal neurons at 1-14 days post-injection but nothing at >3 weeks<br>* Injections in adults: nothing | Fusion of retrovirus-infected microglia with newborn pyramidal neurons | Focused on pyramidal neurons                 | [S4] |
| 15 Wistar male rats                                                | 3-4 month old                              | * BrdU: one IP injection (50 mg/kg)<br><br>* Survival:<br>2hr: DCX+/NG2+, not DCX+/NG2-<br>14-28 days: 7/1168 and 4/843<br>BrdU/DCX+/NG2-<br>But no BrdU/NeuN+                                                               | None                                                                                                                                                                                                                                            | Perhaps transient DCX+ cells generation but no neurons                 | Unknown BrdU+ counted for NeuN staining      | [S5] |
| <b>Mice</b>                                                        |                                            |                                                                                                                                                                                                                              |                                                                                                                                                                                                                                                 |                                                                        |                                              |      |
| C57BL/6 mice                                                       | 2 month old                                | * BrdU: 50 mg/kg, one/day IP for 10 days<br>* Survival: 4 weeks                                                                                                                                                              | None                                                                                                                                                                                                                                            | No BrdU/NeuN found but only 40-50 cells analyzed                       |                                              | [S6] |

## Supplemental References

- S1 Bhardwaj,R.D. *et al.* (2006) Neocortical neurogenesis in humans is restricted to development. *Proc. Natl. Acad. Sci. U. S. A* 103, 12564-12568
- S2 Kornack,D.R. *et al.* (2001) Cell proliferation without neurogenesis in adult primate neocortex. *Science* 294, 2127-2130
- S3 Takemura,N.U. (2005) Evidence for neurogenesis within the white matter beneath the temporal neocortex of the adult rat brain. *Neuroscience* 134, 121-132
- S4 Ackman,J.B. *et al.* (2006) Fusion of microglia with pyramidal neurons after retroviral infection. *J Neurosci.* 26, 11413-11422
- S5 Tamura,Y. *et al.* (2007) Multi-directional differentiation of doublecortin- and NG2-immunopositive progenitor cells in the adult rat neocortex *in vivo*. *Eur. J. Neurosci.* 25, 3489-3498
- S6 Ehninger,D. *et al.* (2003) Regional effects of wheel running and environmental enrichment on cell genesis and microglia proliferation in the adult murine neocortex. *Cereb. Cortex* 13, 845-851
